# Supplementary material
Source: Springer Nature journal article supplement (https://www.springermedizin.de/resource/supplementary/12885_2012_3747_MOESM4_ESM.pdf/9464806)
Supplement: MOESM4 [file 9464806]

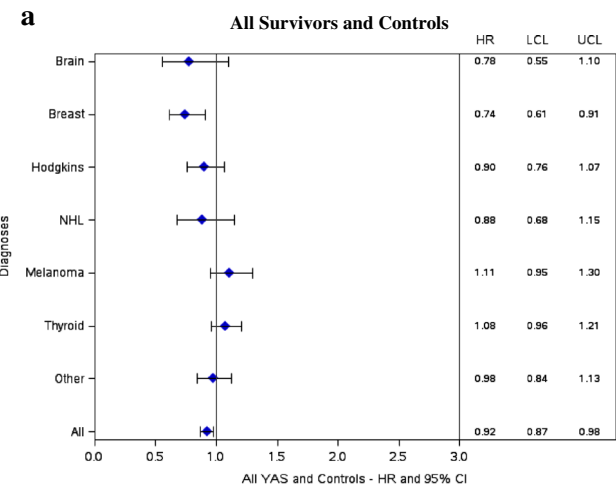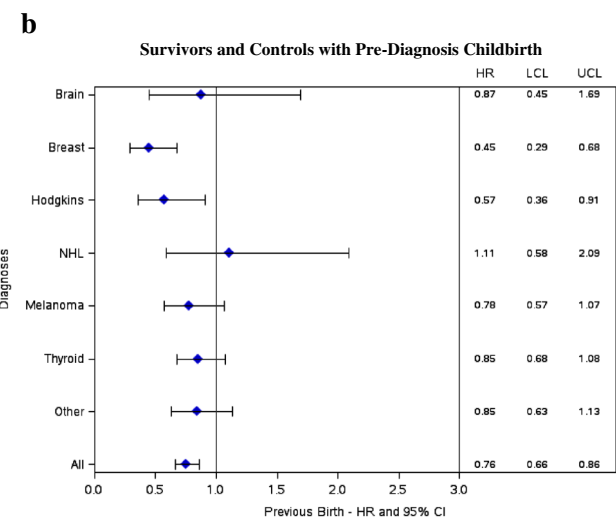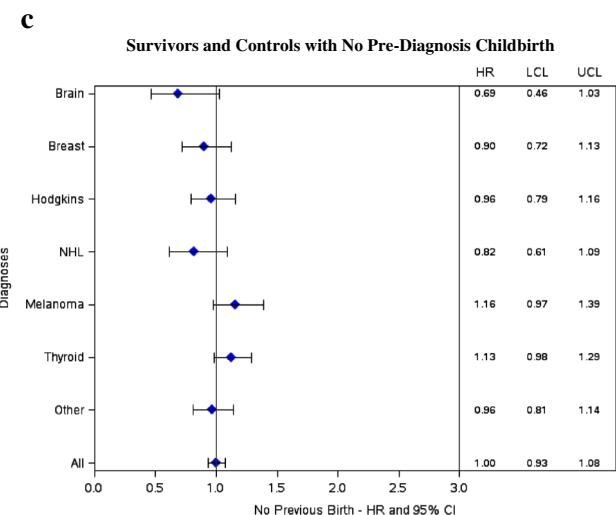

Legend:

NHL = Non-hodgkin lymphoma

YAS = Young Adult Survivors

HR = Hazards Ration

CI = Confidence Interval
